# Supplementary material for: Loss of the E3 ubiquitin ligase HACE1 results in enhanced Rac1 signaling contributing to breast cancer progression
Source: PubMed Central journal article supplement (PMC4633721; doi:10.1038/onc.2014.468), 2015-02-09
Supplement: onc2014468x1.pdf [file onc2014468x1.pdf]

Supplementary Table 1

| <b>Putative Oncogene/Tumor<br/>Suppressor Gene List</b> |
|---------------------------------------------------------|
| Caspase 9                                               |
| ASS1                                                    |
| Slc25a43                                                |
| HACE1                                                   |
| Rragc                                                   |

Supplementary Table 1 - List of putative oncogenes/tumor suppressor identified in VBIM screen. Genes identified after 3' RACE on cDNA obtained from VBIM soft agar colonies
