# Supplementary material for: Loss of the E3 ubiquitin ligase HACE1 results in enhanced Rac1 signaling contributing to breast cancer progression
Source: PubMed Central journal article supplement (PMC4633721; doi:10.1038/onc.2014.468), 2015-02-09
Supplement: onc2014468x4.pdf [file onc2014468x4.pdf]

## Supplementary Fig. 3

a

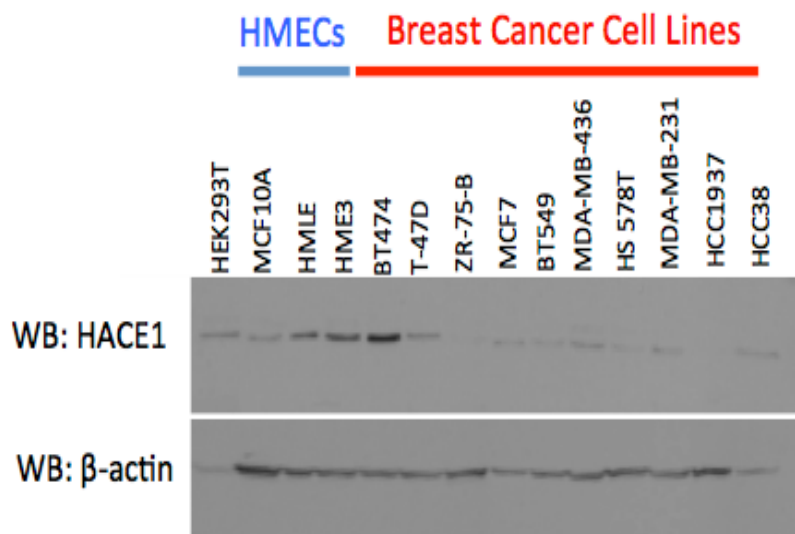

**Supplementary Fig. 3 – HACE1 is down in breast cancer cell lines.** (a) Western blot analysis for HACE1 on a panel of human mammary epithelial cells (HMECs) and established breast cancer cell lines. Actin is used as control.
