# Supplementary material for: Loss of the E3 ubiquitin ligase HACE1 results in enhanced Rac1 signaling contributing to breast cancer progression
Source: PubMed Central journal article supplement (PMC4633721; doi:10.1038/onc.2014.468), 2015-02-09
Supplement: onc2014468x5.pdf [file onc2014468x5.pdf]

## Supplementary Fig. 4

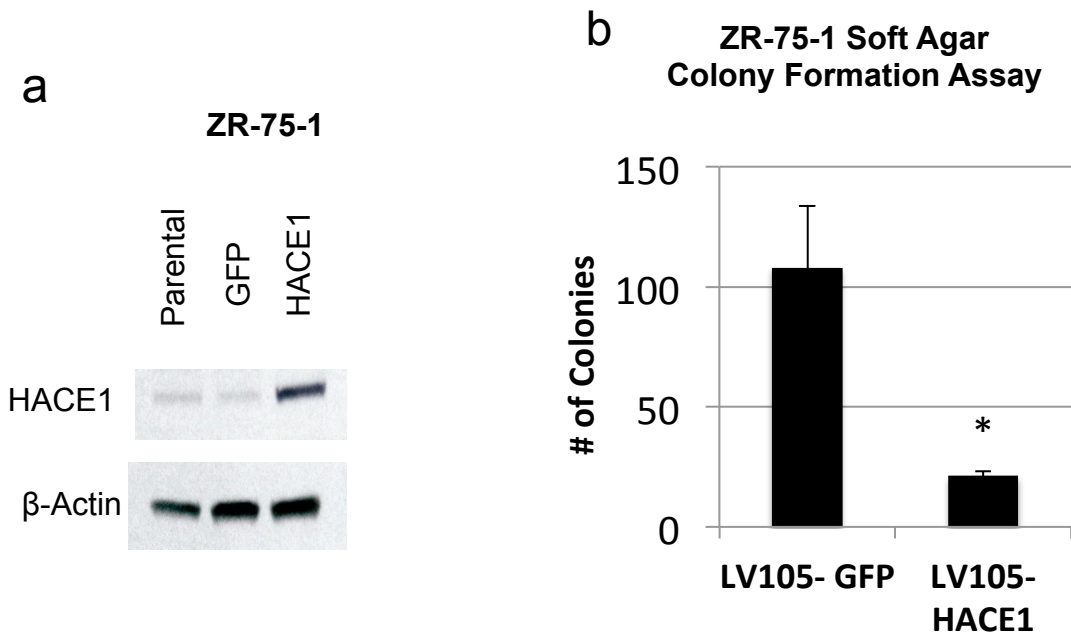

**Supplementary Fig. 4 – HACE1 expression in ZR-75-1 cells reduces clonogenicity** (a) stable HACE1 overexpression in ZR-75-1 determined by western blot. GFP is control. (b) Soft agar colony formation of ZR-75-1 HACE1 and GFP control cells. (1), (\*P < 0.01 between groups, Student's t-test). Data are expressed as mean  $\pm$  SEM of three separate experiments.
