# Supplementary material for: Loss of the E3 ubiquitin ligase HACE1 results in enhanced Rac1 signaling contributing to breast cancer progression
Source: PubMed Central journal article supplement (PMC4633721; doi:10.1038/onc.2014.468), 2015-02-09
Supplement: onc2014468x8.pdf [file onc2014468x8.pdf]

Supplementary Fig. 7

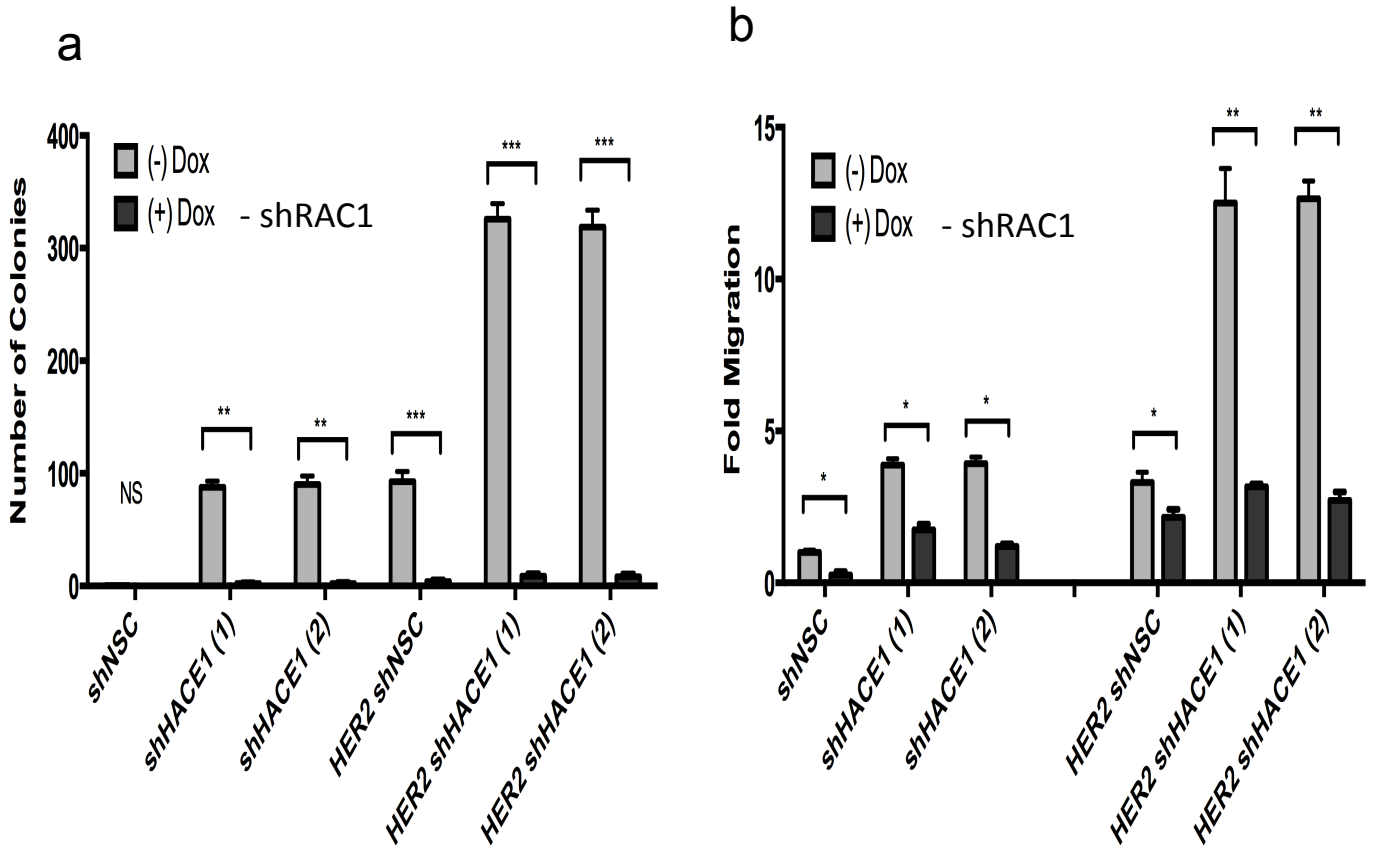

**Supplementary Fig. 7 – Rac1 shRNA knockdown reverses cooperative effects of HER2 overexpression and HACE1 loss** (a) Soft agar colony formation of MCF12A shHACE1 (1), MCF12A shHACE1 (2), MCF12A shNSC, MCF12A-HER2 shHACE1 (1), MCF12A-HER2 shHACE1 (2), MCF12A-HER2 shNSC cells with and without DOX induction of Rac1 shRNA (\*\*P < 0.001, \*\*\*P < 0.0001 between groups, Student’s t-test). Data are expressed as mean ± SEM of three separate experiments. (b) *in vitro* migration (20 h) of MCF12A shHACE1 (1), MCF12A shHACE1 (2), MCF12A shNSC, MCF12A-HER2 shHACE1 (1), MCF12A-HER2 shHACE1 (2), MCF12A-HER2 shNSC cells with and without DOX induction of Rac1 shRNA as determined by Boyden chamber. 100 ng/ml EGF and 10 ng/ml HRG was used chemotractant (\*P < 0.01, \*\*P < 0.001 between groups, Student’s t-test). Data are expressed as mean ± SEM of three separate experiments.
