# Supplementary material for: Loss of the E3 ubiquitin ligase HACE1 results in enhanced Rac1 signaling contributing to breast cancer progression
Source: PubMed Central journal article supplement (PMC4633721; doi:10.1038/onc.2014.468), 2015-02-09
Supplement: onc2014468x10.pdf [file onc2014468x10.pdf]

## Supplementary Fig. 9

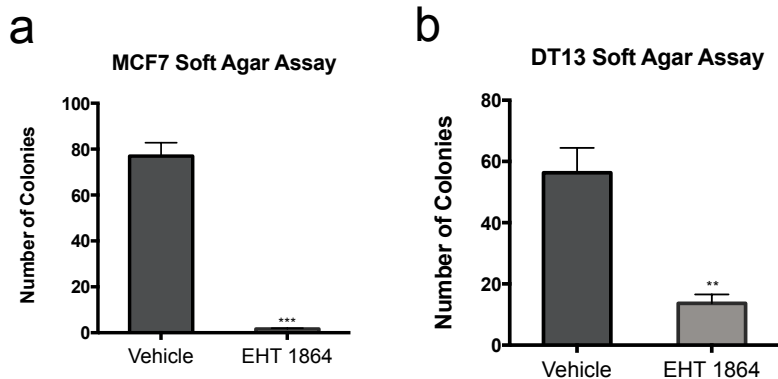

**Supplementary Fig. 9 – Rac1 inhibition attenuates growth of breast cancer cell lines in soft agar (a)** Soft agar colony formation of MCF7 cells treated with vehicle or 25  $\mu\text{M}$  EHT 1864 ( $***P < 0.0001$  between groups, Student's t-test). **(b)** Soft agar colony formation of DT13 cells treated with vehicle or 25  $\mu\text{M}$  EHT 1864 ( $**P < 0.001$ , between groups, Student's t-test). Data are expressed as mean  $\pm$  SEM of three separate experiments.
